# Supplementary material for: Functional Analysis of the “Green Revolution” Gene Photoperiod-1 and Its Selection Trends During Bread Wheat Breeding
Source: Front Plant Sci. 2021 Nov 11;12:745411. doi: 10.3389/fpls.2021.745411 (PMC8631784; doi:10.3389/fpls.2021.745411)
Supplement: Supplementary file 1 [file Data_Sheet_1.xlsx]

## Sheet: Table S1
Table S1 The origins, release dates, pedigrees, Ppd-1 haplotypes and allele designations of 188 wheat accessions.
Name	Decade	Origin	Pedigrees	Ppd-A1 haplotype	Ppd-A1 allele designation	Ppd-B1 haplotype	Ppd-B1 allele designation	Ppd-D1 haplotype	Ppd-D1 allele designation
Chaichun 044	1980S	Qinghai, China	Gaoyuan 55 / 111D74-765	Hapl-A2	Ppd-A1b.AII	Hapl-B1	Ppd-B1a & Methylation hapl a	Hapl-D1	Ppd-D1a
Gaoyuan 465	1980S	Qinghai, China	Shicha 18 / Gaoyuan 338	Hapl-A2	Ppd-A1b.AII	Hapl-B1	Ppd-B1c & Methylation hapl a	Hapl-D1	Ppd-D1a
Humai 12	1980S	Qinghai, China	Jin 2148 / Huzhuhong	Hapl-A2	Ppd-A1b.AII	Hapl-B2	Ppd-B1b & Methylation hapl b	Hapl-D2	Ppd-D1c
Lumai 1	1980S	Shandong, China	Aifeng 3 // Mengxian 201 / Neuzucht	Unknown	Unknown	Hapl-B2	Ppd-B1b & Methylation hapl b	Hapl-D1	Ppd-D1a
Lumai 18	1980S	Shandong, China	86026 / 8-038 // Peixian 3041-1	Hapl-A2	Ppd-A1b.AII	Hapl-B2	Ppd-B1b & Methylation hapl b	Hapl-D1	Ppd-D1a
Mianyang 20	1980S	Sichuan, China	Mianyang 11	Hapl-A1	Ppd-A1b.AI	Unknown	Unknown	Hapl-D1	Ppd-D1a
Qingnong 469	1980S	Qinghai, China	Unknown	Hapl-A2	Ppd-A1b.AII	Hapl-B2	Ppd-B1b & Methylation hapl b	Hapl-D1	Ppd-D1a
Rikaze 2	1980S	Tibet, China	Unknown	Hapl-A2	Ppd-A1b.AII	Hapl-B2	Ppd-B1b & Methylation hapl b	Hapl-D1	Ppd-D1a
Xinzhe 9	1980S	Qinghai, China	Unknown	Hapl-A2	Ppd-A1b.AII	Hapl-B2	Ppd-B1b & Methylation hapl b	Hapl-D1	Ppd-D1a
Chaichun 901	1990S	Qinghai, China	Unknown	Hapl-A2	Ppd-A1b.AII	Hapl-B2	Ppd-B1b & Methylation hapl b	Hapl-D1	Ppd-D1a
Chuanmai 28	1990S	Sichuan, China	Wanya 2 / 2874 // Gaojiasuo / 2874	Hapl-A2	Ppd-A1b.AII	Hapl-B1	Ppd-B1c & Methylation hapl a	Hapl-D1	Ppd-D1a
Chuanmai 41	1990S	Sichuan, China	91T4135	Hapl-A1	Ppd-A1b.AI	Hapl-B1	Ppd-B1c & Methylation hapl a	Hapl-D1	Ppd-D1a
Chuanyu 17	1990S	Sichuan, China	Mianyang 26	Hapl-A2	Ppd-A1b.AII	Hapl-B1	Ppd-B1c & Methylation hapl a	Hapl-D1	Ppd-D1a
Ganchun 20	1990S	Gansu, China	88-862 / 630	Hapl-A2	Ppd-A1b.AII	Hapl-B1	Ppd-B1a & Methylation hapl a	Hapl-D1	Ppd-D1a
Gaoyuan 205	1990S	Qinghai, China	80642 / Gaoyuan 338 //81-143 Gaoyuan 472 /// Gaoyuan 472 / Duoniansheng 1	Hapl-A2	Ppd-A1b.AII	Hapl-B2	Ppd-B1b & Methylation hapl b	Hapl-D1	Ppd-D1a
Gaoyuan 356	1990S	Qinghai, China	Lanlixiaomai / 83-22S-2	Hapl-A2	Ppd-A1b.AII	Unknown	Unknown	Hapl-D1	Ppd-D1a
Gaoyuan V028	1990S	Qinghai, China	HER / SAP"S" // VEE	Hapl-A1	Ppd-A1b.AI	Hapl-B2	Ppd-B1b & Methylation hapl b	Hapl-D1	Ppd-D1a
Humai 14	1990S	Qinghai, China	Chuanyu19643 / Acoadras	Hapl-A2	Ppd-A1b.AII	Hapl-B2	Ppd-B1b & Methylation hapl b	Hapl-D1	Ppd-D1a
Jimai 22	1990S	Shandong, China	935024 / 935106	Hapl-A1	Ppd-A1b.AI	Hapl-B1	Ppd-B1a & Methylation hapl a	Hapl-D1	Ppd-D1a
Jinan 17	1990S	Shandong, China	Linfen5064 / Lumai13	Hapl-A2	Ppd-A1b.AII	Hapl-B2	Ppd-B1b & Methylation hapl b	Hapl-D1	Ppd-D1a
Jing 411	1990S	Beijing, China	Fengkang 2	Hapl-A2	Ppd-A1b.AII	Hapl-B1	Ppd-B1c & Methylation hapl a	Hapl-D1	Ppd-D1a
Lemai 5	1990S	Qinghai, China	Abbondanza	Hapl-A1	Ppd-A1b.AI	Hapl-B2	Ppd-B1b & Methylation hapl b	Hapl-D1	Ppd-D1a
Lemai 6	1990S	Qinghai, China	Abbondanza	Hapl-A1	Ppd-A1b.AI	Hapl-B1	Ppd-B1c & Methylation hapl a	Hapl-D1	Ppd-D1a
Lumai 23	1990S	Shandong, China	Lumai 8 / Gaolaixiaomai	Hapl-A2	Ppd-A1b.AII	Hapl-B1	Ppd-B1c & Methylation hapl a	Hapl-D1	Ppd-D1a
Luozhen 1	1990S	Henan, China	Yanshi 86117	Hapl-A2	Ppd-A1b.AII	Hapl-B1	Ppd-B1a & Methylation hapl a	Hapl-D1	Ppd-D1a
Mianyang 28	1990S	Sichuan, China	T7935	Hapl-A1	Ppd-A1b.AI	Hapl-B1	Ppd-B1c & Methylation hapl a	Hapl-D1	Ppd-D1a
Minhe 588	1990S	Qinghai, China	ALOndraS76 // Opal / Orofen	Hapl-A1	Ppd-A1b.AI	Hapl-B2	Ppd-B1b & Methylation hapl b	Hapl-D1	Ppd-D1a
Minhe 853	1990S	Qinghai, China	Aobole / Orofen // Alongde S-76	Hapl-A1	Ppd-A1b.AI	Hapl-B2	Ppd-B1b & Methylation hapl b	Hapl-D1	Ppd-D1a
Qingchun 254	1990S	Qinghai, China	Taigu genic male-sterile wheat	Hapl-A2	Ppd-A1b.AII	Hapl-B2	Ppd-B1b & Methylation hapl b	Hapl-D1	Ppd-D1a
Qingchun 415	1990S	Qinghai, China	Unknown	Hapl-A1	Ppd-A1b.AI	Hapl-B2	Ppd-B1b & Methylation hapl b	Hapl-D1	Ppd-D1a
Qingchun 891	1990S	Qinghai, China	Unknown	Hapl-A1	Ppd-A1b.AI	Hapl-B2	Ppd-B1b & Methylation hapl b	Hapl-D1	Ppd-D1a
Shi 4185	1990S	Hebei, China	The cultivar is derived from the use of Taigu genic male-sterile wheat, which is selected by the polymerization cross-breeding of Zhi 8094, Baofeng 7228, and Shi 84-7120	Hapl-A2	Ppd-A1b.AII	Hapl-B1	Ppd-B1a & Methylation hapl a	Hapl-D1	Ppd-D1a
Yuanzhuo 3	1990S	Qinghai, China	Xuan135 / 633	Hapl-A1	Ppd-A1b.AI	Hapl-B2	Ppd-B1b & Methylation hapl b	Hapl-D2	Hapl-D2
Zhangchun 811	1990S	Hebei, China	Unknown	Hapl-A2	Ppd-A1b.AII	Hapl-B2	Ppd-B1b & Methylation hapl b	Hapl-D1	Ppd-D1a
Zhongyou 9507	1990S	Beijing, China	Zhongyou 8	Hapl-A2	Ppd-A1b.AII	Hapl-B2	Ppd-B1b & Methylation hapl b	Hapl-D1	Ppd-D1a
Cangmai 028	2000S	Hebei, China	98(083) / canghe030	Hapl-A2	Ppd-A1b.AII	Hapl-B1	Ppd-B1a & Methylation hapl a	Hapl-D1	Ppd-D1a
Chuanmai 107	2000S	Sichuan, China	2469	Hapl-A1	Ppd-A1b.AI	Hapl-B1	Ppd-B1a & Methylation hapl a	Hapl-D1	Ppd-D1a
Chuanmai 36	2000S	Sichuan, China	SW5193	Hapl-A1	Ppd-A1b.AI	Hapl-B2	Ppd-B1b & Methylation hapl b	Hapl-D1	Ppd-D1a
Chuanmai 42	2000S	Sichuan, China	SynCD768 / SW3243 // Chuan6415	Hapl-A1	Ppd-A1b.AI	Hapl-B1	Ppd-B1c & Methylation hapl a	Hapl-D1	Ppd-D1a
Chuanmai 44	2000S	Sichuan, China	96Xia440	Hapl-A1	Ppd-A1b.AI	Hapl-B1	Ppd-B1c & Methylation hapl a	Hapl-D1	Ppd-D1a
Chuanmai 45	2000S	Sichuan, China	GH430	Hapl-A2	Ppd-A1b.AII	Hapl-B1	Ppd-B1c & Methylation hapl a	Hapl-D1	Ppd-D1a
Chuanmai 46	2000S	Sichuan, China	Ta193-6280	Hapl-A1	Ppd-A1b.AI	Hapl-B1	Ppd-B1c & Methylation hapl a	Hapl-D1	Ppd-D1a
Chuanmai 54	2000S	Sichuan, China	92R171 / 98Jian335	Hapl-A1	Ppd-A1b.AI	Unknown	Unknown	Hapl-D1	Ppd-D1a
Chuanmai 56	2000S	Sichuan, China	Chuanmai 30	Hapl-A1	Ppd-A1b.AI	Hapl-B2	Ppd-B1b & Methylation hapl b	Hapl-D1	Ppd-D1a
Chuannong 12	2000S	Sichuan, China	915-23	Hapl-A2	Ppd-A1b.AII	Hapl-B1	Ppd-B1c & Methylation hapl a	Hapl-D1	Ppd-D1a
Chuannong 16	2000S	Sichuan, China	Chuanyu 12	Hapl-A2	Ppd-A1b.AII	Hapl-B2	Ppd-B1b & Methylation hapl b	Hapl-D1	Ppd-D1a
Chuannong 17	2000S	Sichuan, China	Mianyang 26	Unknown	Unknown	Hapl-B1	Ppd-B1c & Methylation hapl a	Hapl-D1	Ppd-D1a
Chuannong 18	2000S	Sichuan, China	R164-1	Hapl-A2	Ppd-A1b.AII	Hapl-B1	Ppd-B1c & Methylation hapl a	Hapl-D1	Ppd-D1a
Chuannong 19	2000S	Sichuan, China	Qian1104A	Hapl-A1	Ppd-A1b.AI	Hapl-B2	Ppd-B1b & Methylation hapl b	Hapl-D1	Ppd-D1a
Chuannong 20	2000S	Sichuan, China	78-5035	Hapl-A1	Ppd-A1b.AI	Hapl-B1	Ppd-B1c & Methylation hapl a	Hapl-D1	Ppd-D1a
Chuannong 21	2000S	Sichuan, China	R841	Hapl-A1	Ppd-A1b.AI	Hapl-B2	Ppd-B1b & Methylation hapl b	Hapl-D1	Ppd-D1a
Chuannong 22	2000S	Sichuan, China	R164	Hapl-A1	Ppd-A1b.AI	Hapl-B1	Ppd-B1c & Methylation hapl a	Hapl-D1	Ppd-D1a
Chuannong 23	2000S	Sichuan, China	R1685	Hapl-A1	Ppd-A1b.AI	Hapl-B1	Ppd-B1c & Methylation hapl a	Hapl-D1	Ppd-D1a
Chuannong 27	2000S	Sichuan, China	Chuannong 19	Hapl-A1	Ppd-A1b.AI	Hapl-B2	Ppd-B1b & Methylation hapl b	Hapl-D1	Ppd-D1a
Chuanyu 16	2000S	Sichuan, China	30020 / 8619-10	Hapl-A1	Ppd-A1b.AI	Hapl-B1	Ppd-B1c & Methylation hapl a	Hapl-D2	Ppd-D1d
Chuanyu 18	2000S	Sichuan, China	Chuanyu 5 / Mo 460	Hapl-A1	Ppd-A1b.AI	Hapl-B1	Ppd-B1c & Methylation hapl a	Hapl-D1	Ppd-D1a
Chuanyu 19	2000S	Sichuan, China	Chuanyu 5 / Mo 460	Hapl-A1	Ppd-A1b.AI	Hapl-B1	Ppd-B1c & Methylation hapl a	Hapl-D1	Ppd-D1a
Chuanyu 20	2000S	Sichuan, China	SW3243	Hapl-A1	Ppd-A1b.AI	Unknown	Unknown	Hapl-D2	Ppd-D1d
Chuanyu 21	2000S	Sichuan, China	Zhou88114	Hapl-A1	Ppd-A1b.AI	Hapl-B2	Ppd-B1b & Methylation hapl b	Hapl-D1	Ppd-D1a
Chuanyu 23	2000S	Sichuan, China	R59	Hapl-A2	Ppd-A1b.AII	Hapl-B1	Ppd-B1c & Methylation hapl a	Hapl-D1	Ppd-D1a
Chuanyu 24	2000S	Sichuan, China	Zhou88114	Hapl-A1	Ppd-A1b.AI	Hapl-B2	Ppd-B1b & Methylation hapl b	Hapl-D1	Ppd-D1a
Gaoyuan 412	2000S	Qinghai, China	Gaoyuan 602 / 181 // Linfen 5309	Hapl-A2	Ppd-A1b.AII	Hapl-B2	Ppd-B1b & Methylation hapl b	Hapl-D2	Ppd-D1b
Gaoyuan 671	2000S	Qinghai, China	Ningchun 10 / Lupu	Hapl-A2	Ppd-A1b.AII	Hapl-B2	Ppd-B1b & Methylation hapl b	Hapl-D2	Ppd-D1d
Humai 13	2000S	Qinghai, China	80-1-1 / Acoadras	Hapl-A1	Ppd-A1b.AI	Hapl-B1	Ppd-B1a & Methylation hapl a	Hapl-D1	Ppd-D1a
Jimai 20	2000S	Shandong, China	Lumai14 / 884187	Hapl-A1	Ppd-A1b.AI	Hapl-B2	Ppd-B1b & Methylation hapl b	Hapl-D1	Ppd-D1a
Jimai 21	2000S	Shandong, China	865168 / Nongda 84-1109 // Ji 84-5418	Hapl-A2	Ppd-A1b.AII	Hapl-B1	Ppd-B1a & Methylation hapl a	Hapl-D1	Ppd-D1a
Kenong 9204	2000S	Hebei, China	SA502 / 6021	Hapl-A2	Ppd-A1b.AII	Hapl-B1	Ppd-B1a & Methylation hapl a	Hapl-D1	Ppd-D1a
Liangxing 66	2000S	Shandong, China	Ji 91102	Hapl-A1	Ppd-A1b.AI	Hapl-B1	Ppd-B1a & Methylation hapl a	Hapl-D1	Ppd-D1a
Liangxing 99	2000S	Shandong, China	Ji 91102 / Lumai14 // PH85-16	Hapl-A1	Ppd-A1b.AI	Hapl-B1	Ppd-B1a & Methylation hapl a	Hapl-D1	Ppd-D1a
Liaomai 18	2000S	Shandong, China	89B08-3-10-1-8 / Lumai 23	Hapl-A1	Ppd-A1b.AI	Hapl-B1	Ppd-B1c & Methylation hapl a	Hapl-D1	Ppd-D1a
Linmai 2	2000S	Shandong, China	Lumai23 / Lin90-15	Hapl-A2	Ppd-A1b.AII	Hapl-B2	Ppd-B1b & Methylation hapl b	Hapl-D1	Ppd-D1a
Linmai 4	2000S	Shandong, China	Lumai23 / Lin90-15	Hapl-A2	Ppd-A1b.AII	Hapl-B2	Ppd-B1b & Methylation hapl b	Hapl-D1	Ppd-D1a
Lumai 21	2000S	Shandong, China	Lumai13 / Baofeng7228	Hapl-A2	Ppd-A1b.AII	Hapl-B1	Ppd-B1a & Methylation hapl a	Hapl-D1	Ppd-D1a
Luohan 6	2000S	Henan, China	Yumai 49 / Shannong 45	Hapl-A2	Ppd-A1b.AII	Hapl-B1	Ppd-B1a & Methylation hapl a	Hapl-D1	Ppd-D1a
Luohan 7	2000S	Henan, China	Wenmai 4 / Shannong 45	Hapl-A2	Ppd-A1b.AII	Hapl-B1	Ppd-B1a & Methylation hapl a	Hapl-D1	Ppd-D1a
Luyuan 205	2000S	Shandong, China	Unknown	Hapl-A2	Ppd-A1b.AII	Hapl-B1	Ppd-B1d & Methylation hapl a	Hapl-D1	Ppd-D1a
Mian 33	2000S	Sichuan, China	1294 / Mianyang 86-5	Hapl-A2	Ppd-A1b.AII	Hapl-B1	Ppd-B1c & Methylation hapl a	Hapl-D1	Ppd-D1a
Mian 37	2000S	Sichuan, China	3796EW37 / Mianyang 90-100	Hapl-A2	Ppd-A1b.AII	Hapl-B1	Ppd-B1c & Methylation hapl a	Hapl-D1	Ppd-D1a
Mian 38	2000S	Sichuan, China	07146-12-1 / Guinong 19-4	Hapl-A1	Ppd-A1b.AI	Unknown	Unknown	Hapl-D1	Ppd-D1a
Mianmai 45	2000S	Sichuan, China	07146-12-1 / Guinong 19-4	Hapl-A1	Ppd-A1b.AI	Hapl-B1	Ppd-B1c & Methylation hapl a	Hapl-D1	Ppd-D1a
Minhe 665	2000S	Qinghai, China	Unknown	Unknown	Unknown	Hapl-B2	Ppd-B1b & Methylation hapl b	Hapl-D1	Ppd-D1a
Ningchun 26	2000S	Ningxia, China	Yong 257 / Yongliang 1	Hapl-A1	Ppd-A1b.AI	Hapl-B2	Ppd-B1b & Methylation hapl b	Hapl-D1	Ppd-D1a
Qimai 1	2000S	Shandong, China	Chang 95-8 / Yunfengzao 21	Hapl-A2	Ppd-A1b.AII	Hapl-B1	Ppd-B1a & Methylation hapl a	Hapl-D1	Ppd-D1a
Qingchun 587	2000S	Qinghai, China	The common wheat line 108 was introduced through the pollen-tube-pathway method and bred systematically among the offspring variants.	Unknown	Unknown	Unknown	Unknown	Hapl-D1	Ppd-D1a
Qingchun 952	2000S	Qinghai, China	Qingchun 891 // Triticum polonicum / TB115	Hapl-A2	Ppd-A1b.AII	Hapl-B1	Ppd-B1d & Methylation hapl a	Hapl-D1	Ppd-D1a
Qingfeng 1	2000S	Shandong, China	Lumai 14 / Yannong 15	Hapl-A2	Ppd-A1b.AII	Hapl-B1	Ppd-B1a & Methylation hapl a	Hapl-D1	Ppd-D1a
Shanhan 901	2000S	Qinghai, China	Minhe 853	Hapl-A1	Ppd-A1b.AI	Hapl-B1	Ppd-B1d & Methylation hapl a	Hapl-D1	Ppd-D1a
Shannong 15	2000S	Shandong, China	Jinan 17 / Jihe 916	Hapl-A2	Ppd-A1b.AII	Hapl-B1	Ppd-B1c & Methylation hapl a	Hapl-D1	Ppd-D1a
Shannong 16	2000S	Shandong, China	Jinan 13 / Han 635	Hapl-A1	Ppd-A1b.AI	Hapl-B1	Ppd-B1a & Methylation hapl a	Hapl-D1	Ppd-D1a
Shixin 828	2000S	Hebei, China	422 / Shixin 63 // 612	Hapl-A1	Ppd-A1b.AI	Hapl-B2	Ppd-B1b & Methylation hapl b	Hapl-D1	Ppd-D1a
Tainong 18	2000S	Shandong, China	974-1253 / Yexuan 1 // You 7 / Lovrin 10 / 3 / Lumai 14 / 4 / Yan 369-7	Hapl-A1	Ppd-A1b.AI	Hapl-B1	Ppd-B1a & Methylation hapl a	Hapl-D1	Ppd-D1a
Taishan 21	2000S	Shandong, China	26744 / Taishan 10 // Luami 7 / 3 / Lumai 18	Hapl-A2	Ppd-A1b.AII	Hapl-B1	Ppd-B1a & Methylation hapl a	Hapl-D1	Ppd-D1a
Taishan 22	2000S	Shandong, China	Lumai 18 / Lumai 14	Unknown	Unknown	Hapl-B2	Ppd-B1b & Methylation hapl b	Hapl-D1	Ppd-D1a
Taishan 24	2000S	Shandong, China	904017 / Zhengzhou 8329	Hapl-A2	Ppd-A1b.AII	Hapl-B2	Ppd-B1b & Methylation hapl b	Hapl-D1	Ppd-D1a
Taishan 9818	2000S	Shandong, China	Taishan 187 / 935021	Hapl-A2	Ppd-A1b.AII	Hapl-B1	Ppd-B1a & Methylation hapl a	Hapl-D1	Ppd-D1a
Tongmai 1	2000S	Qinghai, China	Huzhuhong / Qingchun 533	Hapl-A2	Ppd-A1b.AII	Hapl-B2	Ppd-B1b & Methylation hapl b	Hapl-D2	Ppd-D1c
Weimai 8	2000S	Shandong, China	88-3149 / Aus621108	Unknown	Unknown	Hapl-B2	Ppd-B1b & Methylation hapl b	Hapl-D1	Ppd-D1a
Wennong 5	2000S	Shandong, China	Lumai 21 / Taishan 5	Unknown	Unknown	Hapl-B1	Ppd-B1a & Methylation hapl a	Hapl-D1	Ppd-D1a
Xinmai 289	2000S	Shandong, China	935031 / Lumai 14	Hapl-A2	Ppd-A1b.AII	Hapl-B1	Ppd-B1a & Methylation hapl a	Hapl-D1	Ppd-D1a
Yangmai 15	2000S	Jiangsu, China	Yang 89-40 / Chuanyu 21526	Hapl-A1	Ppd-A1b.AI	Hapl-B1	Ppd-B1a & Methylation hapl a	Hapl-D1	Ppd-D1a
Yannong 19	2000S	Shandong, China	Yan1933 / Shan82-29	Hapl-A1	Ppd-A1b.AI	Hapl-B1	Ppd-B1c & Methylation hapl a	Hapl-D1	Ppd-D1a
Yannong 21	2000S	Shandong, China	Yan1933 / Shan82-29	Hapl-A1	Ppd-A1b.AI	Hapl-B1	Ppd-B1a & Methylation hapl a	Hapl-D1	Ppd-D1a
Yannong 22	2000S	Shandong, China	Lumai 14 // Wei132 / 87Chu20	Hapl-A2	Ppd-A1b.AII	Hapl-B1	Ppd-B1a & Methylation hapl a	Hapl-D1	Ppd-D1a
Yannong 23	2000S	Shandong, China	Yan1061 / Lumai 14	Hapl-A1	Ppd-A1b.AI	Hapl-B1	Ppd-B1a & Methylation hapl a	Hapl-D1	Ppd-D1a
Yannong 24	2000S	Shandong, China	Shan229 // Youbao / St2422/464	Hapl-A1	Ppd-A1b.AI	Hapl-B1	Ppd-B1a & Methylation hapl a	Hapl-D1	Ppd-D1a
Yingbo 700	2000S	Hebei, China	Taigu genic male-sterile wheat / Ji 93-5031	Hapl-A1	Ppd-A1b.AI	Hapl-B1	Ppd-B1a & Methylation hapl a	Hapl-D1	Ppd-D1a
Zhengmai 9023	2000S	Henan, China	Xiaoyan 6 / Xinong 65 // 83(2)3-3 / 84(14)43 / 31 / Shan 213	Hapl-A2	Ppd-A1b.AII	Hapl-B2	Ppd-B1b & Methylation hapl b	Hapl-D1	Ppd-D1a
Zhongyou 206	2000S	Beijing, China	CA9614 / Zhongyou 9507	Hapl-A2	Ppd-A1b.AII	Hapl-B2	Ppd-B1b & Methylation hapl b	Hapl-D1	Ppd-D1a
Zhouyuan 9369	2000S	Shandong, China	PH82-2-2 / 866-34	Hapl-A2	Ppd-A1b.AII	Hapl-B1	Ppd-B1c & Methylation hapl a	Hapl-D1	Ppd-D1a
Zimai 12	2000S	Shandong, China	917065 / 910292	Unknown	Unknown	Hapl-B1	Ppd-B1a & Methylation hapl a	Hapl-D1	Ppd-D1a
Chuanchongzu 104	2010S	Sichuan, China	Unknown	Hapl-A2	Ppd-A1b.AII	Hapl-B1	Ppd-B1c & Methylation hapl a	Hapl-D1	Ppd-D1a
Chuanmai 58	2010S	Sichuan, China	Chuanmai 42 / 03Jian3	Hapl-A1	Ppd-A1b.AI	Unknown	Unknown	Hapl-D1	Ppd-D1a
Heng S29	2010S	Hebei, China	Heng 98-5229	Hapl-A2	Ppd-A1b.AII	Hapl-B1	Ppd-B1d & Methylation hapl a	Hapl-D1	Ppd-D1a
Hualong 808	2010S	Hebei, China	Beinong 9549 / Zhoumai 16	Hapl-A2	Ppd-A1b.AII	Hapl-B1	Ppd-B1a & Methylation hapl a	Hapl-D1	Ppd-D1a
Huiyan 912	2010S	Anhui, China	Zhoumai 16 / Yannong19	Hapl-A2	Ppd-A1b.AII	Hapl-B1	Ppd-B1a & Methylation hapl a	Hapl-D1	Ppd-D1a
Jimai 23	2010S	Shandong, China	Yumai 34 / Jimai 22	Hapl-A2	Ppd-A1b.AII	Unknown	Unknown	Hapl-D1	Ppd-D1a
Jimai 262	2010S	Shandong, China	Linmai 2 / Yannong 19	Hapl-A2	Ppd-A1b.AII	Unknown	Unknown	Hapl-D1	Ppd-D1a
Jimai 39	2010S	Hebei, China	Unknown	Hapl-A1	Ppd-A1b.AI	Hapl-B1	Ppd-B1a & Methylation hapl a	Hapl-D1	Ppd-D1a
Kenxing 1	2010S	Heilongjiang, China	CN01-3 / Yannong 19	Hapl-A2	Ppd-A1b.AII	Hapl-B1	Ppd-B1a & Methylation hapl a	Hapl-D1	Ppd-D1a
KY 088	2010S	Shandong, China	Unknown	Unknown	Unknown	Hapl-B1	Ppd-B1a & Methylation hapl a	Hapl-D1	Ppd-D1a
Liangxing 77	2010S	Shandong, China	Ji 91102 / Jimai 19	Hapl-A1	Ppd-A1b.AI	Hapl-B1	Ppd-B1a & Methylation hapl a	Hapl-D1	Ppd-D1a
Linmai 9	2010S	Shandong, China	Lin044190 / Taishan 23	Hapl-A2	Ppd-A1b.AII	Hapl-B1	Ppd-B1d & Methylation hapl a	Hapl-D1	Ppd-D1a
Lunxuan 1690	2010S	Beijing, China	Jingdong 8 / Lunxuan 987	Hapl-A2	Ppd-A1b.AII	Hapl-B1	Ppd-B1c & Methylation hapl a	Hapl-D1	Ppd-D1a
Lunxuan 266	2010S	Beijing, China	Jimai 19 / Jimai22 // Jimai 22	Hapl-A1	Ppd-A1b.AI	Hapl-B1	Ppd-B1a & Methylation hapl a	Hapl-D1	Ppd-D1a
Luohan 22	2010S	Henan, China	Zhoumai 16 / Luohan 7	Hapl-A2	Ppd-A1b.AII	Unknown	Unknown	Hapl-D1	Ppd-D1a
Luyuan 502	2010S	Shandong, China	9940168 / Jimai 19	Unknown	Unknown	Hapl-B1	Ppd-B1d & Methylation hapl a	Hapl-D1	Ppd-D1a
Qingfeng 6	2010S	Shandong, China	Unknown	Hapl-A2	Ppd-A1b.AII	Hapl-B1	Ppd-B1d & Methylation hapl a	Hapl-D1	Ppd-D1a
Qingfeng 7	2010S	Shandong, China	Unknown	Hapl-A2	Ppd-A1b.AII	Hapl-B1	Ppd-B1a & Methylation hapl a	Hapl-D1	Ppd-D1a
Qingnong 2	2010S	Shandong, China	Lumai 14 / Yannong 15 // Aiganmai	Hapl-A2	Ppd-A1b.AII	Hapl-B1	Ppd-B1a & Methylation hapl a	Hapl-D1	Ppd-D1a
Shannong 116	2010S	Shandong, China	W080068 / Shi 4185	Hapl-A1	Ppd-A1b.AI	Hapl-B1	Ppd-B1a & Methylation hapl a	Hapl-D1	Ppd-D1a
Shannong 22	2010S	Shandong, China	Taigu genic male-sterile wheat	Hapl-A1	Ppd-A1b.AI	Hapl-B1	Ppd-B1c & Methylation hapl a	Hapl-D1	Ppd-D1a
Shannong 23	2010S	Shandong, China	Taigu genic male-sterile wheat	Hapl-A1	Ppd-A1b.AI	Hapl-B1	Ppd-B1c & Methylation hapl a	Hapl-D1	Ppd-D1a
Shannong 25	2010S	Shandong, China	J1697 / Yannong 19	Hapl-A1	Ppd-A1b.AI	Hapl-B1	Ppd-B1a & Methylation hapl a	Hapl-D1	Ppd-D1a
Shengmai 102	2010S	Shandong, China	Shannong 2149 / Liangxing 619	Hapl-A1	Ppd-A1b.AI	Hapl-B1	Ppd-B1a & Methylation hapl a	Hapl-D1	Ppd-D1a
Shi 12-4025	2010S	Hebei, China	Ji5265 / Jinhe 9123	Hapl-A2	Ppd-A1b.AII	Hapl-B1	Ppd-B1a & Methylation hapl a	Hapl-D1	Ppd-D1a
Shimai 25	2010S	Hebei, China	Jimai22 / Jinhe 9123	Hapl-A1	Ppd-A1b.AI	Hapl-B1	Hapl-B1	Hapl-D1	Ppd-D1a
Shimai 26	2010S	Hebei, China	Shiyou 17 / Jimai22	Hapl-A1	Ppd-A1b.AI	Hapl-B1	Hapl-B1	Hapl-D1	Ppd-D1a
Taikemai 30	2010S	Shandong, China	Huaiyin 9908 / Luomai 9424	Hapl-A2	Ppd-A1b.AII	Hapl-B1	Ppd-B1a & Methylation hapl a	Hapl-D1	Ppd-D1a
Taikemai 31	2010S	Shandong, China	Taishan 26 / Huaimai 20	Hapl-A1	Ppd-A1b.AI	Unknown	Unknown	Hapl-D1	Ppd-D1a
Taikemai 33	2010S	Shandong, China	Zhengmai 366 / Huaiyin 9908	Hapl-A1	Ppd-A1b.AI	Unknown	Unknown	Hapl-D1	Ppd-D1a
Tainong 19	2010S	Shandong, China	Laizhou 137 / Jinan 17	Hapl-A1	Ppd-A1b.AI	Hapl-B1	Ppd-B1a & Methylation hapl a	Hapl-D1	Ppd-D1a
Taishan 27	2010S	Shandong, China	Taishan 651 / Zangxuan 1	Hapl-A1	Ppd-A1b.AI	Hapl-B2	Ppd-B1b & Methylation hapl b	Hapl-D1	Ppd-D1a
Taishan 28	2010S	Shandong, China	3262 / Wanmai 38	Unknown	Unknown	Hapl-B1	Ppd-B1c & Methylation hapl a	Hapl-D1	Ppd-D1a
Tanmai 98	2010S	Shandong, China	Jining 13 / 942	Hapl-A2	Ppd-A1b.AII	Hapl-B2	Ppd-B1b & Methylation hapl b	Hapl-D1	Ppd-D1a
Wennong 14	2010S	Shandong, China	84139 // 9215 / 876161	Hapl-A1	Ppd-A1b.AI	Hapl-B1	Ppd-B1d & Methylation hapl a	Hapl-D1	Ppd-D1a
WF 2	2010S	Hebei, China	Liangxing 99 / Yannong 21	Hapl-A1	Ppd-A1b.AI	Hapl-B1	Ppd-B1a & Methylation hapl a	Hapl-D1	Ppd-D1a
Xingmai 13	2010S	Hebei, China	Heng9117-2 / Han4589	Unknown	Unknown	Hapl-B1	Ppd-B1a & Methylation hapl a	Hapl-D1	Ppd-D1a
Xinmai 296	2010S	Shandong, China	935031 / Lumai 23	Hapl-A1	Ppd-A1b.AI	Hapl-B1	Ppd-B1c & Methylation hapl a	Hapl-D1	Ppd-D1a
Yan 1212	2010S	Shandong, China	Yan5072 / Shi94-5300	Hapl-A2	Ppd-A1b.AII	Hapl-B1	Ppd-B1c & Methylation hapl a	Hapl-D1	Ppd-D1a
Yangguang 578	2010S	Henan, China	Aizao 781 / Luomai 4	Hapl-A2	Ppd-A1b.AII	Hapl-B1	Ppd-B1c & Methylation hapl a	Hapl-D1	Ppd-D1a
Yannong 173	2010S	Shandong, China	Jimai 22 / Yan2415	Unknown	Unknown	Hapl-B1	Ppd-B1a & Methylation hapl a	Hapl-D1	Ppd-D1a
Yannong 999	2010S	Shandong, China	Yanhangxuan 2 / Lin 9511 // YanBLU14-15	Unknown	Unknown	Hapl-B1	Ppd-B1a & Methylation hapl a	Hapl-D1	Ppd-D1a
Yaomai 16	2010S	Shanxi, China	Jinmai 54 / Beinong 8	Hapl-A2	Ppd-A1b.AII	Hapl-B2	Ppd-B1b & Methylation hapl b	Hapl-D1	Ppd-D1a
Zhongkemai 138	2010S	Sichuan, China	Chuanmai 42	Hapl-A1	Ppd-A1b.AI	Hapl-B1	Ppd-B1c & Methylation hapl a	Hapl-D1	Ppd-D1a
Zhongkemai 47	2010S	Sichuan, China	W7268 / Durum wheat	Hapl-A2	Ppd-A1b.AII	Hapl-B1	Ppd-B1a & Methylation hapl a	Hapl-D2	Ppd-D1b
Zhongmai 1062	2010S	Beijing, China	Yumai 34 / Lunxuan 9873	Hapl-A2	Ppd-A1b.AII	Hapl-B1	Ppd-B1c & Methylation hapl a	Hapl-D1	Ppd-D1a
Zhongmai 175	2010S	Beijing, China	BPM27 / Jing411	Hapl-A2	Ppd-A1b.AII	Hapl-B1	Ppd-B1c & Methylation hapl a	Hapl-D1	Ppd-D1a
Zhongmai 23	2010S	Beijing, China	Jimai 22 / Huai9701	Hapl-A1	Ppd-A1b.AI	Hapl-B1	Ppd-B1a & Methylation hapl a	Hapl-D1	Ppd-D1a
Zhongmai 415	2010S	Beijing, China	Guinong 11 / Jing411 // Jing411	Hapl-A2	Ppd-A1b.AII	Hapl-B1	Ppd-B1c & Methylation hapl a	Hapl-D1	Ppd-D1a
Zhongmai 895	2010S	Beijing, China	Zhoumai 16 / Liken 4	Hapl-A2	Ppd-A1b.AII	Hapl-B1	Ppd-B1c & Methylation hapl a	Hapl-D1	Ppd-D1a
Zhongmai 998	2010S	Beijing, China	Jidong 3097 / Lunxuan 987	Hapl-A1	Ppd-A1b.AI	Hapl-B1	Ppd-B1c & Methylation hapl a	Hapl-D1	Ppd-D1a
Zimai 28	2010S	Shandong, China	Tainong 18 / Hemai 9735	Hapl-A2	Ppd-A1b.AII	Hapl-B1	Ppd-B1d & Methylation hapl a	Hapl-D1	Ppd-D1a
Zimai 29	2010S	Shandong, China	Tainong 18 / Yan5072	Hapl-A2	Ppd-A1b.AII	Hapl-B1	Ppd-B1a & Methylation hapl a	Hapl-D1	Ppd-D1a
Baihuamai	Landrace	Guizhou, China	——	Hapl-A2	Ppd-A1b.AII	Hapl-B1	Ppd-B1c & Methylation hapl a	Hapl-D2	Ppd-D1b
Baimaizi	Landrace	Sichuan, China	——	Hapl-A2	Ppd-A1b.AII	Hapl-B1	Ppd-B1c & Methylation hapl a	Hapl-D2	Ppd-D1b
Baiyoumai	Landrace	Heilongjiang, China	——	Hapl-A2	Ppd-A1b.AII	Hapl-B1	Ppd-B1c & Methylation hapl a	Hapl-D1	Ppd-D1a
Bangdadongmai	Landrace	Tibet, China	——	Hapl-A1	Ppd-A1b.AI	Hapl-B2	Ppd-B1b & Methylation hapl b	Hapl-D2	Ppd-D1b
Bendihongmai	Landrace	Sichuan, China	——	Hapl-A2	Ppd-A1b.AII	Hapl-B2	Ppd-B1b & Methylation hapl b	Hapl-D1	Ppd-D1a
Bendimai	Landrace	Guizhou, China	——	Hapl-A2	Ppd-A1b.AII	Hapl-B2	Ppd-B1b & Methylation hapl b	Hapl-D2	Hapl-D2
Caijiangmai	Landrace	Guizhou, China	——	Hapl-A2	Ppd-A1b.AII	Hapl-B1	Ppd-B1c & Methylation hapl a	Hapl-D1	Ppd-D1a
Chinese spring	Landrace	Sichuan, China	——	Unknown	Unknown	Hapl-B1	Ppd-B1c & Methylation hapl a	Hapl-D2	Ppd-D1b
Dazibai	Landrace	Shanxi, China	——	Hapl-A1	Ppd-A1b.AI	Hapl-B2	Ppd-B1b & Methylation hapl b	Hapl-D1	Ppd-D1a
Dingxingzhai	Landrace	Shanxi, China	——	Hapl-A1	Ppd-A1b.AI	Hapl-B2	Ppd-B1b & Methylation hapl b	Hapl-D2	Ppd-D1b
Fumai	Landrace	Henan, China	——	Hapl-A2	Ppd-A1b.AII	Hapl-B1	Ppd-B1c & Methylation hapl a	Hapl-D2	Hapl-D2
Hongheshangtou	Landrace	Anhui, China	——	Hapl-A2	Ppd-A1b.AII	Hapl-B1	Ppd-B1c & Methylation hapl a	Hapl-D1	Ppd-D1a
Hongkeyoumang	Landrace	Hunan, China	——	Hapl-A2	Ppd-A1b.AII	Hapl-B1	Ppd-B1c & Methylation hapl a	Hapl-D1	Ppd-D1a
Hongxiuzi	Landrace	China	——	Hapl-A1	Ppd-A1b.AI	Hapl-B1	Ppd-B1c & Methylation hapl a	Hapl-D1	Ppd-D1a
Huajiechangbaican	Landrace	Zhejiang, China	——	Hapl-A2	Ppd-A1b.AII	Hapl-B1	Methylation hapl a	Hapl-D1	Ppd-D1a
Huoqiu	Landrace	Liaoning, China	——	Hapl-A2	Ppd-A1b.AII	Hapl-B2	Ppd-B1b & Methylation hapl b	Hapl-D2	Ppd-D1b
Huxumai	Landrace	Anhui, China	——	Hapl-A2	Ppd-A1b.AII	Hapl-B1	Ppd-B1c & Methylation hapl a	Hapl-D1	Ppd-D1a
Jiacha	Landrace	Tibet, China	——	Hapl-A2	Ppd-A1b.AII	Hapl-B2	Ppd-B1b & Methylation hapl b	Hapl-D2	Ppd-D1b
Jiangdongmen	Landrace	Jiangsu, China	——	Unknown	Unknown	Hapl-B2	Ppd-B1b & Methylation hapl b	Hapl-D1	Ppd-D1a
Jiangmai	Landrace	Guizhou, China	——	Hapl-A1	Ppd-A1b.AI	Hapl-B1	Methylation hapl a	Hapl-D1	Ppd-D1a
Jianweihudouhuang	Landrace	Sichuan, China	——	Hapl-A2	Ppd-A1b.AII	Hapl-B1	Ppd-B1c & Methylation hapl a	Hapl-D2	Ppd-D1b
Kangdingxiaomai	Landrace	Sichuan, China	——	Unknown	Unknown	Hapl-B1	Methylation hapl a	Hapl-D2	Ppd-D1b
Laomai	Landrace	Shanxi, China	——	Hapl-A2	Ppd-A1b.AII	Hapl-B2	Ppd-B1b & Methylation hapl b	Hapl-D1	Ppd-D1a
Qubaichun	Landrace	Tibet, China	——	Hapl-A2	Ppd-A1b.AII	Hapl-B1	Ppd-B1a & Methylation hapl a	Hapl-D1	Ppd-D1a
TIBET	Landrace	Tibet, China	——	Hapl-A1	Ppd-A1b.AI	Unknown	Unknown	Unknown	Unknown

## Sheet: Table S2
Table S2 Information on the seven environments used in this study.
No.	Years	Environment	Location
E1	2017-2018	Qixia	121.07°E, 37.49°N
E2	2018-2019	Weifang	119.44°E, 36.68°N
E3	2018-2019	Pulagu	121.41°E, 37.31°N
E4	2019-2020	Shijiazhuang	114.69°E, 37.89°N
E5	2019-2020	Weifang	119.44°E, 36.68°N
E6	2019-2020	Pulagu	121.41°E, 37.31°N
E7	2019-2020	Ludong University	121.35°E, 37.51°N

## Sheet: Table S3
Table S3 Molecular markers of Ppd-1.
Gene	Variation type	Primer name	Sequence (5'-3')	References
Ppd-A1	Promoter variation	Ag5del_F2	CGTCACCCATGCACTCTGTT	Wilhelm et al., 2009; Muterko et al., 2015
		Ag5del_R2	CTGGCTCCAAGAGGAAACAC
Ppd-B1	DNA methylation	B1_HpaII_F1	GGGGCCTTAAGATCGCCGATG	This paper
		B1_HpaII_R1	CGTGGACGAAATGGAGGC
	Copy number variation	CS-copy-F1	TAACTGCTCCTCACAAGTGC	Díaz et al., 2012; Cane et al., 2013
		CS-copy-R1	CCGGAACCTGAGGATCATC
		S64-copy-F1	CCAGGCGAGTGATTTACACA
		S64-copy-R1	GGGCACGTTAACACACCTTT
		CNV10-F	CCCGTCATCAGTAAGCACCCCCTCGCCGC
		CNV10-R	CAGCAGCAGTAGTATTTCTGAATGATGATACACC
		C-F	ACCTGACCTTGTAAAACCATTCAT
		C-R	TGACATCCTCCAACATCTCTAAC
Ppd-D1	2 kb deletion in the promoter	Ppd-D1_F	ACGCCTCCCACTACACTG	Beales et al., 2007; Guo et al., 2010
		Ppd-D1_R1	GTTGGTTCAAACAGAGAGC
		Ppd-D1_R2	CACTGGTGGTAGCTGAGATT
	TE insertion in the first intron	D520F	AGGTCCTTACTCATACTCAATCTCA
		D520R	CTCCCATTGTTGGTGTTGTTA
		D78F	CCATTCGAGGAGACGATTCAT
		D78R	CTGAGAAAGAACAGAGTCAA
	5 bp deletion in the seventh exon	D5-1F	GAATGGCTTCTCCTGGTC
		D5-1R	GATGGGCGAAACCTTATT
		D5-2F	GTGTCCTTTGCGAATCCTT
		D5-2R	TTGGAGCCTTGCTTCATCT
	16 bp insertion in the eighth exon	exon8_F1	GATGAACATGAAACGGG
		exon8_R1	GTCTAAATAGTAGGTACTAGG

## Sheet: Table S4
Table S4 Primers used in this study.
Primer Name	Sequence (5'-3')	Purpose
Ppd-B1-CG2-F	GGGGTTTTAAGATYGTYGATGTTAAAYGTAGTT	Bisulfite genomic sequencing (Sun et al., 2014)
Ppd-B1-CG2-1R	CCCTCRCTCRCCTCTCAATCAACTCCTTAA
qRT-Ppd-A1-F1	GTTCGAGCTGCTGACCTGATT	RT-PCR and qRT-PCR for Ppd-A1
qRT-Ppd-A1-R1	GAGGTCCGACCGTCTCACA
qRT-Ppd-B1-F1	GGAAAGACAAGGTTGATGACG	RT-PCR and qRT-PCR for Ppd-B1
qRT-Ppd-B1-R1	CCCGAGGGATTGATCACG
qRT-Ppd-D1-F1	TTATGGAAAATTCGGATGAGC	RT-PCR and qRT-PCR for Ppd-D1
qRT-Ppd-D1-R1	GAGGAGCAGTTAGGAGCATCTAT
GAPDH-F	TTAGACTTGCGAAGCCAGCA	RT-PCR and qRT-PCR for GAPDH
GAPDH-R	AAATGCCCTTGAGGTTTCCC
Ppd-D1-1301-F1	TTCTGCAGGTCGACTCTAGAGGATCCATGTTTCCTCTTGGAGCCAG	Vector construction for pCAMBIA1301
Ppd-D1-1301-R1	GAGCGGCCGCCACCGCGGTGGAGCTCCTAGGTGTGTGGCGGGAGGT

## Sheet: Table S5
Table S5 Functional classification basis of Ppd-1 haplotypes.
Gene	Haplotype	Allele designation		References
Ppd-A1	Hapl-A1	Ppd-A1b AI		Wilhelm et al., 2009; Muterko et al., 2015
	Hapl-A2	Ppd-A1b AII
Ppd-B1	Hapl-B1	Ppd-B1a	Methylation hapl a	Díaz et al., 2012; Cane et al., 2013; Sun et al., 2014
		Ppd-B1c	Methylation hapl a
		Ppd-B1d	Methylation hapl a
	Hapl-B2	Ppd-B1b	Methylation hapl b
Ppd-D1	Hapl-D1	Ppd-D1a		Beales et al., 2007; Guo et al., 2010; Cane et al., 2013
	Hapl-D2	Ppd-D1b
		Ppd-D1c
		Ppd-D1d
